# Supplementary material for: Volatile Metabolism of Wine Grape Trincadeira: Impact of Infection with Botrytis cinerea
Source: MDPI journal article supplement (doi:10.3390/plants11010141), 2022-01-05
Supplement: s1 [file s1]

# Volatile metabolism of wine grape Trincadeira: impact of infection with *Botrytis cinerea*

Helena Santos<sup>1</sup>, Catarina Augusto<sup>1</sup>, Pedro Reis<sup>2</sup>, Cecília Rego<sup>2</sup>, Ana Cristina Figueiredo<sup>3</sup>,  
and Ana Margarida Fortes<sup>1</sup>

<sup>1</sup>BioISI – Biosystems and Integrative Sciences Institute, Faculty of Sciences, University of Lisbon, Campo Grande,  
1749-016 Lisboa, Portugal

<sup>2</sup>Instituto Superior de Agronomia, Universidade de Lisboa, Tapada da Ajuda, 1349-017 Lisboa, Portugal

<sup>3</sup>Centro de Estudos do Ambiente e do Mar (CESAM Lisboa), Faculdade de Ciências da Universidade de Lisboa,  
Centro de Biotecnologia Vegetal (CBV), DBV, C2, Piso 1, Campo Grande, 1749-016 Lisboa, Portugal

## Supplementary Data

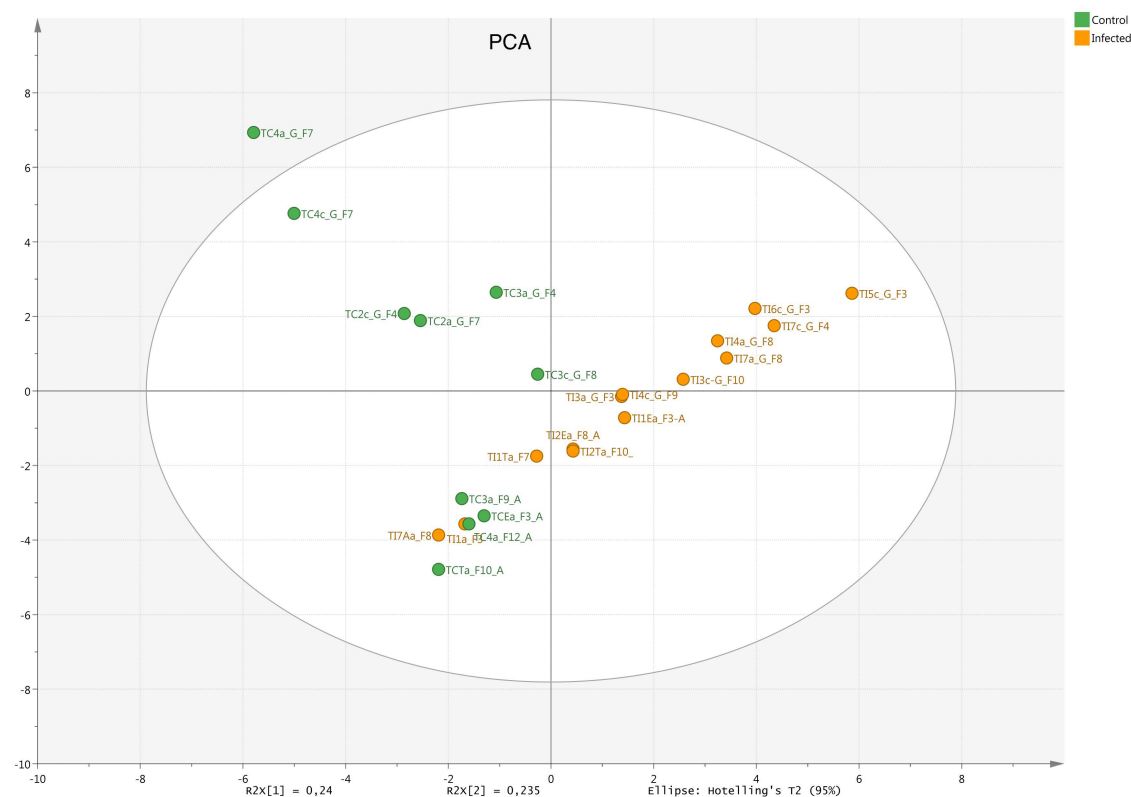

Figure S1: Principal Component Analysis of total volatile organic compounds, explaining 48% of the variability. Green circles represent healthy samples and yellow circles represent infected samples. A separation across the first principal component is clear.

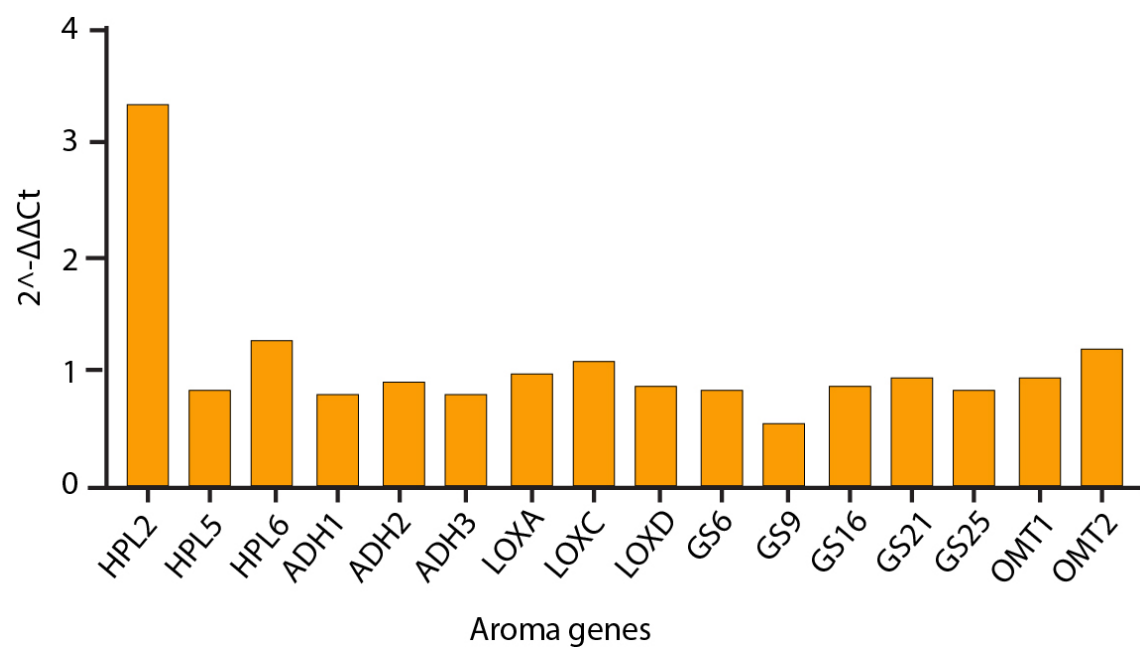

Figure S2: Plot with  $2^{-\Delta\Delta C_t}$  values between control and infected samples for all the genes tested. Genes with value below 1 were not considered for the further experiments. The expression of certain genes (Fig. 6) was further determined using a standard curve, as described in Materials & Methods.

Table S1: Free and glycosidic bound volatile organic compounds expressed as percentage of total volatile organic compounds content, in both control and *Botrytis cinerea* infected Trincadeira grapes. Free and glycosidic form volatile organic compounds were analysed in separate runs.

| VOCs                        | RI   | Free form percentage |          | Glycosidic bound percentage |          |
|-----------------------------|------|----------------------|----------|-----------------------------|----------|
|                             |      | Control              | Infected | Control                     | Infected |
| Ethanol                     | 493  | 7.0                  | 37.4     | 41.8                        | 82.2     |
| Isopropyl Alcohol           | 495  | 7.0                  | 9.9      |                             | t        |
| Acetaldehyde                | 497  | 24.0                 | 5.1      |                             |          |
| Ethyl acetate               | 603  |                      | 17.5     | t                           | 9.7      |
| Acetic acid                 | 606  | t                    | t        | t                           | 0.6      |
| Isoamyl alcohol             | 722  |                      | 0.8      | 5.2                         | 1.7      |
| Amyl alcohol                | 839  |                      |          |                             | 0.2      |
| Hexanal                     | 840  | 6.0                  | 0.4      |                             | t        |
| 2- <i>trans</i> -Hexenal    | 866  | 32.5                 | 7.2      |                             |          |
| <i>cis</i> -2-Hexen-1-ol    | 882  | 2.3                  | 6.9      |                             |          |
| <i>n</i> -Hexanol           | 882  | 15.6                 | 11.3     | 9.2                         | 0.5      |
| Isoamyl acetate             | 882  |                      |          |                             | 0.6      |
| 2-Methyl butyl acetate      | 882  |                      | t        | t                           | 0.3      |
| Hexanoic acid               | 970  |                      |          |                             | t        |
| Ethyl hexanoate             | 965  |                      |          | 0.5                         | 0.1      |
| Hexyl acetate               | 995  |                      | t        | t                           | 0.3      |
| 2-Phenylethanol             | 1064 | t                    | 0.2      | 0.2                         | 0.3      |
| <i>n</i> -Nonanol           | 1148 |                      | 0.1      | 0.5                         | 0.3      |
| Octanoic acid               | 1149 |                      |          |                             | t        |
| Ethyl octanoate             | 1177 |                      | t        | 2.4                         | 0.1      |
| 2-Phenylethyl acetate       | 1222 |                      | 0.2      | t                           | 0.3      |
| Ethyl nonanoate             | 1273 |                      |          | 1.1                         | t        |
| Nonyl acetate               | 1300 |                      |          | t                           | 0.2      |
| Decanoic acid               | 1356 |                      |          | t                           | 0.2      |
| Hexyl hexanoate             | 1375 |                      |          | 0.5                         |          |
| Ethyl decanoate             | 1387 |                      |          | 18.7                        | 0.9      |
| Dodecanoic Acid             | 1550 |                      |          |                             | 0.1      |
| Ethyl dodecanoate           | 1580 |                      |          | 15.2                        | 0.6      |
| Ethyl tetradecanoate        | 1774 |                      |          | 1.2                         | 0.1      |
| <i>n</i> -Octadecane (C18)  | 1800 | 1.2                  | 1.1      |                             |          |
| <i>n</i> -Nonadecane (C19)  | 1900 | 2.7                  | 1.6      |                             |          |
| Ethyl hexadecanoate         | 1936 |                      |          | 2.4                         | 0.4      |
| <i>n</i> -Eicosane (C20)    | 2000 | 1.5                  | 0.1      |                             |          |
| <i>n</i> -Heneicosane (C21) | 2100 | t                    | 0.1      |                             |          |
| Linoleic acid               | 2137 |                      |          | 1.1                         | 0.3      |
| <i>n</i> -Docosane (C22)    | 2200 | t                    | t        |                             |          |

RI: Retention index relative to C<sub>4</sub>-C<sub>22</sub> *n*-alkanes on the DB-1 column. t: traces (<0.05%)

Table S2: List of primers selected from the literature that were used for the qPCR analysis. Tm: Melting temperature in °C.

| Gene ID           | Protein      | Orientation | Sequence                    | Tm(°C) |
|-------------------|--------------|-------------|-----------------------------|--------|
| GSVIVP00014710001 | HPL2         | Forward     | GAGAGGAAGCTTGCCACAAC        | 58     |
|                   |              | Reverse     | AGACTTCATCAGCGGCATCT        |        |
| GSVIVP00036456001 | HPL5         | Forward     | CTTCTTCCTCTCTTCCCCTCA       | 58     |
|                   |              | Reverse     | AGAAGTGGTCACGGCCTTC         |        |
| GSVIVP00036457001 | HPL6         | Forward     | CGAGGCAGACTTCAATGACA        | 58     |
|                   |              | Reverse     | TTGACGGTAAGGGAAAGGTG        |        |
| GSVIVP00014303001 | ADH1         | Forward     | GGTCAAGTCATCTGCTGCAA        | 58     |
|                   |              | Reverse     | CGAAAATTCGAGGGAACAAA        |        |
| GSVIVT01026510001 | ADH2         | Forward     | GCGTTGAGTGTACCGGAAAT        | 58     |
|                   |              | Reverse     | TTTCCACCACTGAAGGAAGG        |        |
| GSVIVP00014300001 | ADH3         | Forward     | AGAGGACTCTCAAGGGCACA        | 58     |
|                   |              | Reverse     | TCCCCCTTCAGCATGTAGTC        |        |
| GSVIVT00024672001 | LOXA         | Forward     | GCAAATCAAAGGGACAACGCTGTATGG | 58     |
|                   |              | Reverse     | TGCTTCCACTGCGGCTTCC         |        |
| GSVIVT00022801001 | LOXC         | Forward     | TGGTGGAAGGAAGTCAGGGAAGAG    | 58     |
|                   |              | Reverse     | TGGGCGGTTTGGGAGGTAGC        |        |
| GSVIVT00013309001 | LOXD         | Forward     | ACCCACCAAATCGTCCCACACTATG   | 58     |
|                   |              | Reverse     | ACCTCTTCGTTGTCTGTCCACTCTG   |        |
| GSVIVT01030549001 | OMT1         | Forward     | CTCCGCATAGCCGATATCAT        | 58     |
|                   |              | Reverse     | GAGAGTTTCTCCGCCATCTG        |        |
| GSVIVT01030545001 | OMT2         | Forward     | ACAAAGGAGTGTCCACGTC         | 58     |
|                   |              | Reverse     | GGCTCATAGCCATCTTCTCG        |        |
| GSVIVT00006898001 | GS6          | Forward     | ACCCTTCAGCAACTCCACAG        | 58     |
|                   |              | Reverse     | TCCAGGTTACACAAAGGAGA        |        |
| GSVIVT01032025001 | GS9          | Forward     | GGAGTGGGGAACCTATTCCCT       | 58     |
|                   |              | Reverse     | CATGTCCCTCAATTCGTGCAT       |        |
| GSVIVT00022347001 | GS16         | Forward     | CAAGGGCAAACCTCTTTTGG        | 58     |
|                   |              | Reverse     | ATTGACCATGCGAAGTACCC        |        |
| GSVIVT01034947001 | GS21         | Forward     | TCTTCAATGGAAGCTGCTGA        | 58     |
|                   |              | Reverse     | CTATTCCCATCCGGAACACA        |        |
| GSVIVT01014400001 | GS25         | Forward     | AATATTGCCTGGGTGTTGGA        | 58     |
|                   |              | Reverse     | TTGGAACCCCATCTCTTTCTC       |        |
| VIT_04s0044g00580 | Actin        | Forward     | GGTCAACCATGTTCCCTGGTATT     | 58     |
|                   |              | Reverse     | GGAGCAAGAGCAGTGATTTCCTT     |        |
| VIT_06s0004g03220 | EF1 $\alpha$ | Forward     | CGTCATAGTTTTCTGCCTTCTTCC    | 58     |
|                   |              | Reverse     | TGCCACCGCCTATCAAGC          |        |
